# Supplementary material
Source: publisher figshare collection journal article supplement (https://springernature.figshare.com/ndownloader/files/22786841)
Supplement: Supplementary file [file 22786841]

## Questionnaire sent out to cattle practitioners in 2009

### Questions:

1. How many dairy farms / dairy cows are you serving in your practice?

2. Have you observed this disease in ,your' farms?

O no (if this is the case, please send us your answer nevertheless)

O yes

3. If yes:

In which timeframe: from (Month/Year) to (Month/Year)

\_\_\_\_\_/\_\_\_\_\_/\_\_\_\_\_ to \_\_\_\_/\_\_\_\_/\_\_\_\_\_

| Farm (anonymised) | Number of affected calves | Number of cows on the farm |
|-------------------|---------------------------|----------------------------|
|                   |                           |                            |
|                   |                           |                            |
|                   |                           |                            |
|                   |                           |                            |
|                   |                           |                            |
|                   |                           |                            |

If there are not enough rows in the table, please add in a separate page.

PRACTICE: \_\_\_\_\_

Tel. Nr. \_\_\_\_\_ Fax. Nr. \_\_\_\_\_

In case you answered with yes, we might ring you back and ask for more information.

Please send your answer back by fax  
or mail to:

Clinic for Ruminants  
Sonnenstr. 16  
85764 Oberschleissheim

FAX Number:



For further information:

Dr.  
Dr.  
Tel:



THANK YOU VERY MUCH FOR YOUR SUPPORT!
